# Supplementary material for: Surface coating and characteristics of ester-free poly(trimethylene carbonate) bearing an aromatic urea moiety for biomaterials use
Source: Royal Society of Chemistry journal article supplement (doi:10.1039/d2ma00209d), 2022-01-01
Supplement: d2ma00209d1.pdf [file d2ma00209d1.pdf]

# Supporting Information for

  

## Surface Coating and Characteristics of Ester-free Poly(trimethylene carbonate) Bearing an Aromatic Urea Moiety for Biomaterials Use

Lee Yae Tan<sup>a</sup>, Nalinthip Chanthaset<sup>a\*</sup>, Hiroharu Ajiro<sup>a,b\*</sup>

<sup>a</sup> *Graduate School of Materials Science, Nara Institute of Science and Technology, 8916-5  
Takayama-cho, Ikoma, Nara 630-0192, Japan.*

<sup>b</sup> *Data Science Center, Nara Institute of Science and Technology, 8916-5 Takayama-cho, Ikoma,  
Nara 630-0192, Japan.*

E-mail: [ajiro@ms.naist.jp](mailto:ajiro@ms.naist.jp)

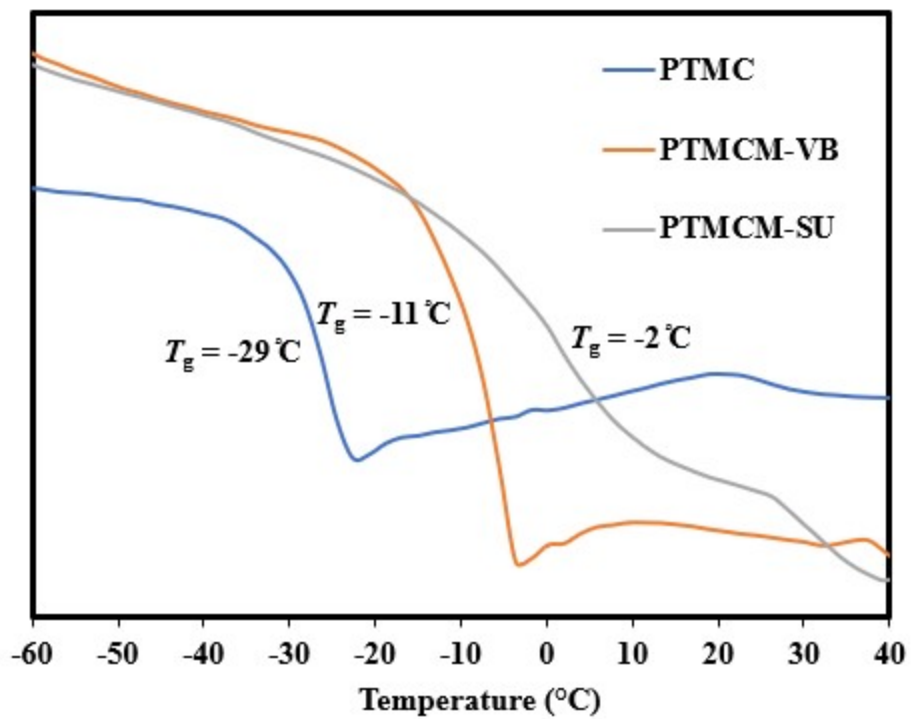

Figure S1. Expanded spectra for glass transition temperature ( $T_g$ ) for PTMC, PTMCM-VB and PTMCM-SU.
